# Supplementary material
Source: PubMed Central journal article supplement (PMC3359919)

## SUPPLEMENTARY DATA

FIG S1. Genotypic comparison between (A) bulging degree and (B) ratio of seed to pod biomass (fresh weight basis) over time (days post-anthesis, dpa) for the bulging seed pocket line 282 and the fleshy, non-bulging pod line 121, as indicated. (C) Correlation between bulging degree and seed-to-pod ratio of both lines. Each value in (A) and (B) represents means  $\pm$  s.e. of 6 biological replicates. Twelve pods and all seeds from the pods (including some shrunken seeds in 121) were used for the calculation. Each replicate includes two pods derived from two plants. When not visible, s.e. bars are smaller than the symbol. Asterisks indicate significant differences (Student *t*-test, \**P* < 0.05; \*\**P* < 0.01). An arcsine transformation of data in (A) and (B) was done for each *t*-test. The correlation coefficient in (C) is significant at *P* < 0.01 according to the Pearson correlation method.

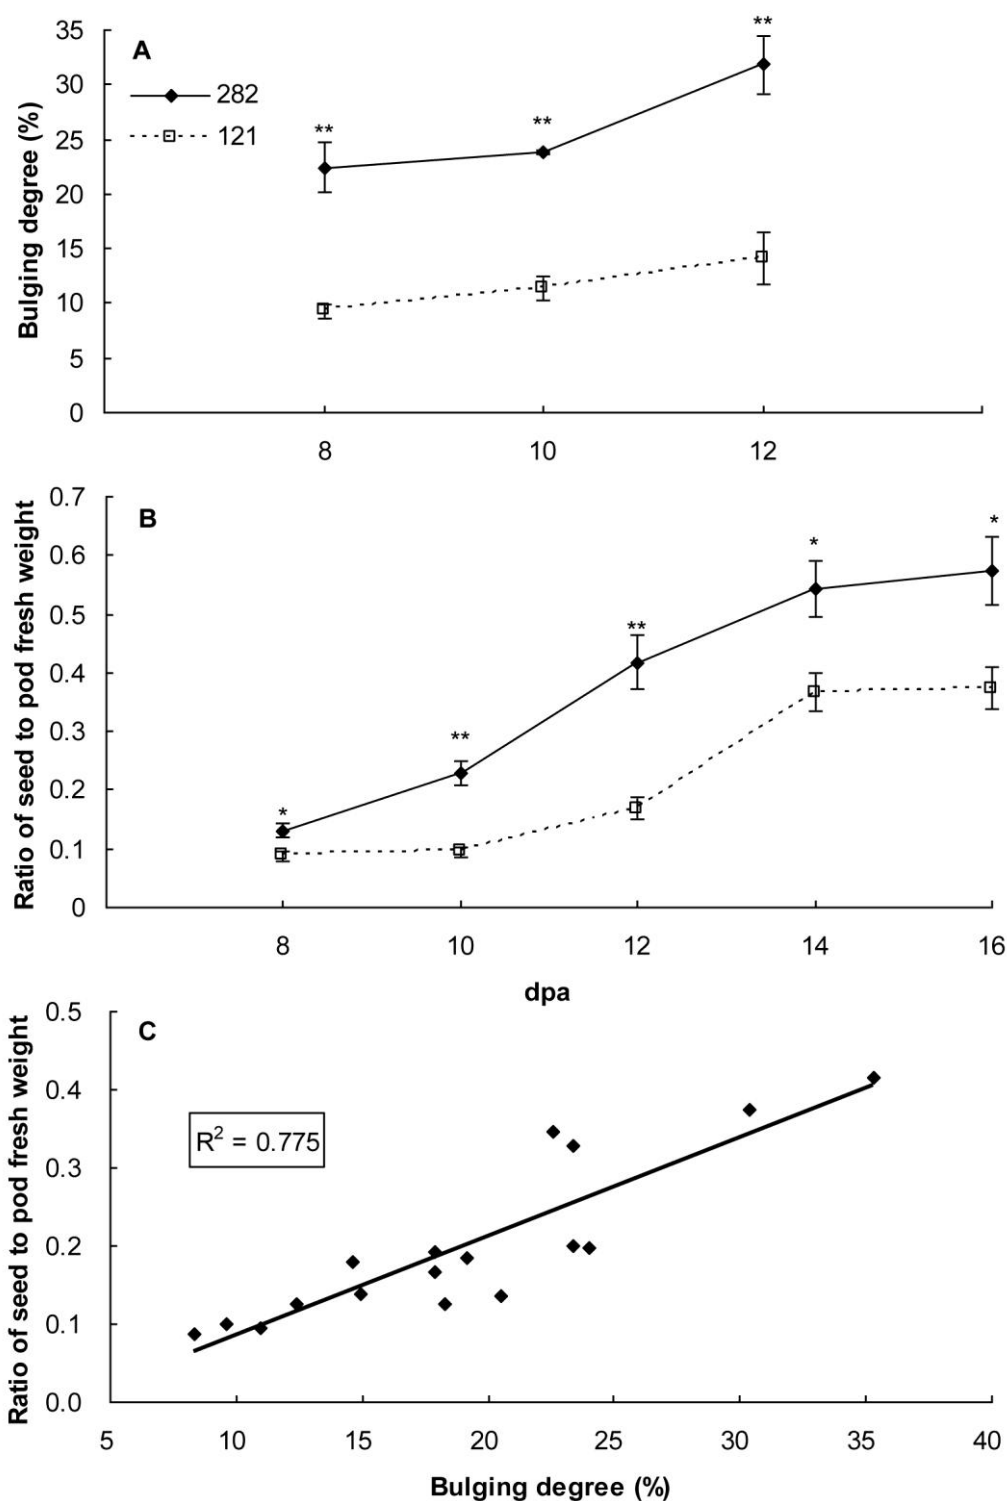

FIG S2. Genotypic comparison of water content in (A) the seed and (B) the pod wall over time (days post-anthesis, dpa) between the bulging seed pocket line 282 and the fleshy-pod line 121, as indicated. Each value in (A) and (B) represents means  $\pm$  s.e. of 3 biological replicates. Asterisks indicate significant differences (Student *t*-test, \* $P < 0.05$ , \*\* $P < 0.01$ ).

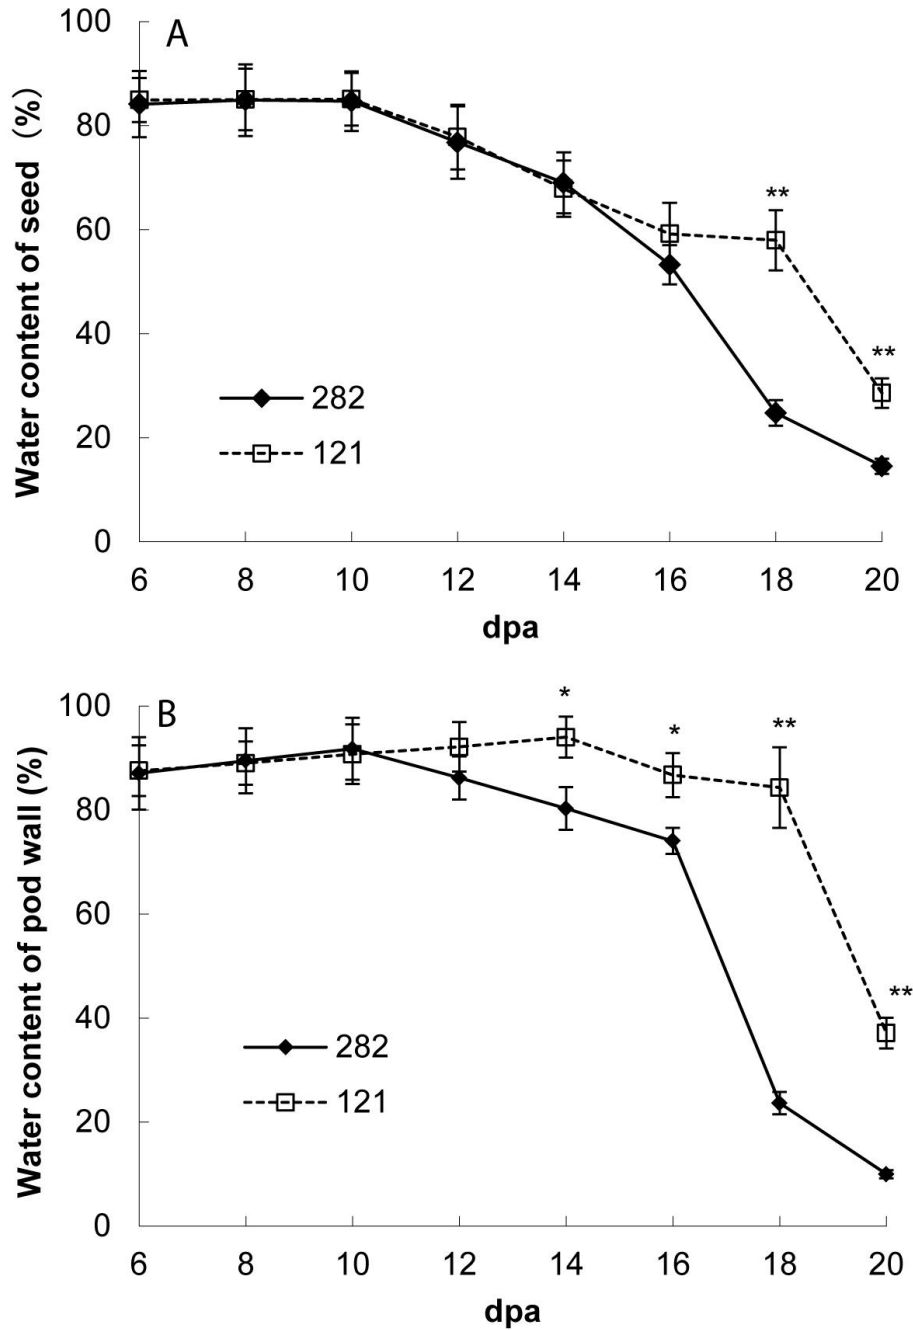

Supplement: supp_mcs060_mcs060supp.pdf [file supp_mcs060_mcs060supp.pdf]
